# Supplementary material for: Short-term activation of the Jun N-terminal kinase pathway in apoptosis-deficient cells of Drosophila induces tumorigenesis
Source: PubMed Central journal article supplement (PMC5906466; doi:10.1038/s41467-018-04000-6), 2018-04-18
Supplement: 41467_2018_4000_MOESM1_ESM.pdf [file 41467_2018_4000_MOESM1_ESM.pdf]

1  
2  
3  
4  
5  
6  
7  
8  
9  
10  
11  
12  
13  
14  
15  
16  
17

Short-term activation of the Jun-N terminal Kinase pathway in apoptosis-deficient cells  
of *Drosophila* induces tumorigenesis

Pinal et al

18 **Supplementary Fig. 1**

19

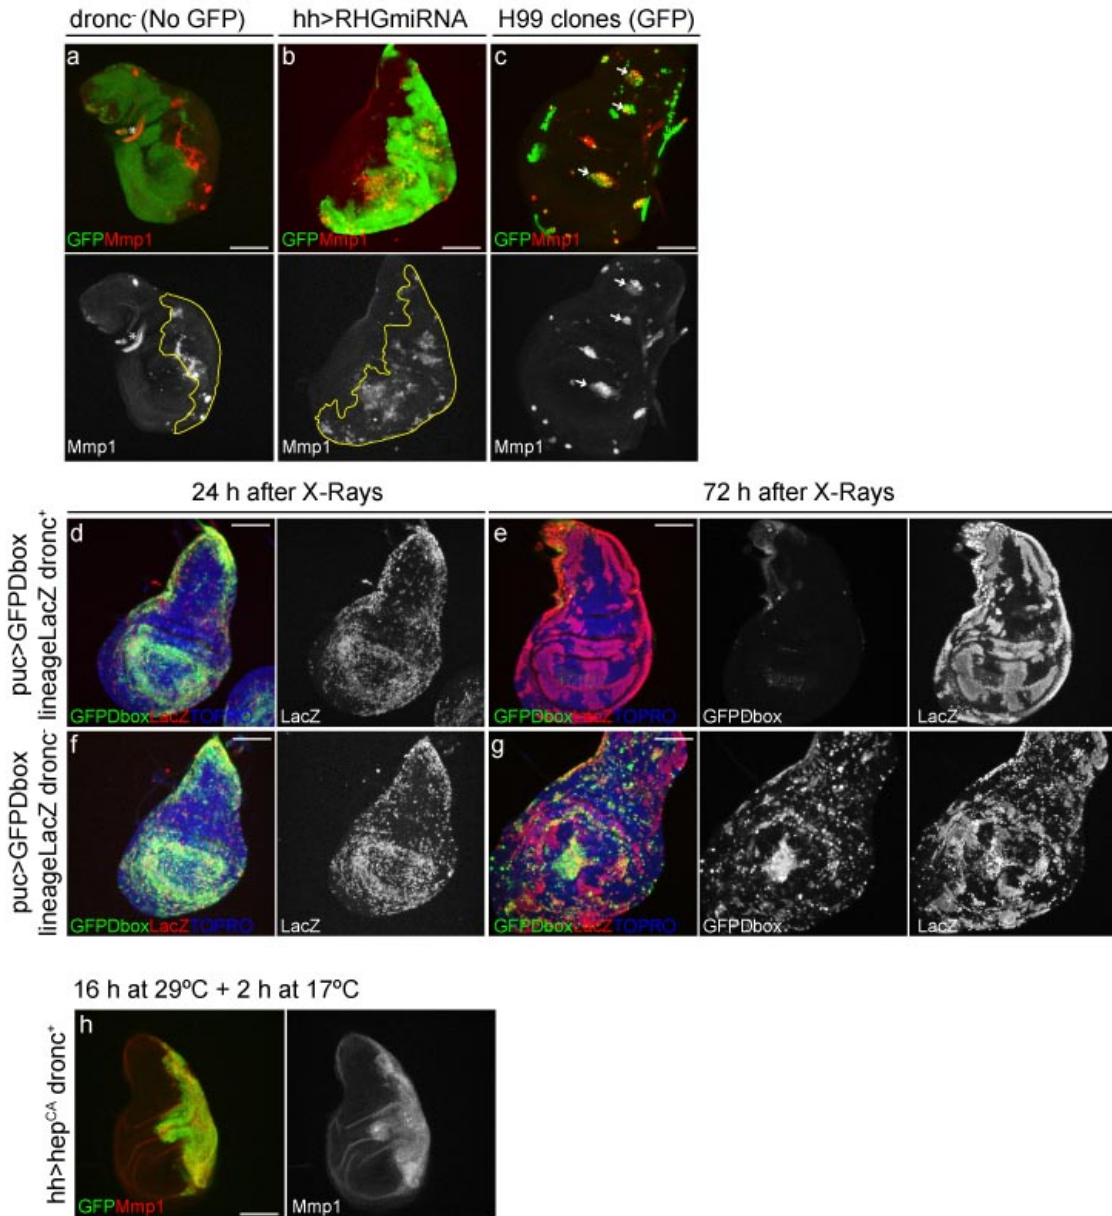

20

21

22 Maintenance of JNK activity in apoptosis deficient cells and lineage tracing of those  
 23 cells **a-c** Persistence of JNK activity 96 h after irradiation in discs of three apoptosis-  
 24 deficient genotypes. **a** Wing disc of genotype *en-Gal4/UAS-*  
 25 *Flp; dronc<sup>i29</sup>FRT2A/M(3)67C FRT2A Ubi-GFP* (n=10). *M<sup>+</sup> dronc<sup>i29</sup>* clones cover most of  
 26 the posterior compartment and lose the GFP mark. The anterior compartment remains  
 27 *dronc<sup>+</sup>* and retains the GFP label. In this experiment we used Mmp1 (red) as marker of  
 28 JNK activity. Note that the red label is restricted to the posterior compartment. The red  
 29 mark in the anterior compartment (asterisk) corresponds to trachea, which are also  
 30 labelled by Mmp1. **b** Wing disc of genotype *UAS-RHG-miRNA/+; hh-Gal4UAS-GFP/+*  
 31 (n=6). The *UAS-RHGmiRNA* construct expresses a microRNA that suppresses the  
 32 proapoptotic genes *reaper*, *hid* and *grim*. Activation of JNK is detected only in the  
 33 posterior compartment (green) with Mmp1 staining (red). **c** Wing disc of genotype *hs-*  
 34 *Flp tub-Gal4UAS-GFP Df(3L)H99FRT2A/FRT2A tub-Gal80* (n=7) containing clones  
 35 homozygous for *DfH99* (green), a deletion removing *reaper*, *hid* and *grim*. JNK activity

36 as revealed by Mmp1 (red) is detected in the clones (arrows). **d-g** Wing discs of  
37 genotype: *UAS-GFPDbox/act<stop>LacZ;puc-Gal4/UAS-flpdronc<sup>i24</sup>* (**d**) 24 h (n=7)  
38 and (**e**) 72 h (n=19) after irradiation and *UAS-GFPDbox/act<stop>LacZ;puc-Gal4*  
39 *dronc<sup>i29</sup>/UAS-flpdronc<sup>i24</sup>* (**f**) 24 h (n=6) and (**g**) 72 h (n=21) after irradiation. After X-  
40 Rays JNK activation induces the expression of *puc-Gal4*, which activates the *UAS-*  
41 *GFPDbox* and the *UAS-flp*, therefore inducing the recombination in the lineage cassette  
42 that labels cells indelibly. 24 h after irradiation most cells positive for GFPDbox are  
43 also labelled with  $\beta$ -Gal, both in *dronc<sup>+</sup>* (**d**) and *dronc<sup>-</sup>* (**f**) discs. Nevertheless, 72 h  
44 after irradiation in the *dronc<sup>+</sup>* control (**e**) many  $\beta$ -Gal (red) positive cells are still present  
45 in the tissue, but only cells in the proximal region maintain *GFPDbox* (green). In  
46 contrast, in the *dronc<sup>-</sup>* mutant (**g**) most cells with  $\beta$ -Gal (red) are also positive for  
47 GFPDbox (green). **h** Control disc for the pulse experiment, genotype; *UAS-hep<sup>CA</sup>/UAS-*  
48 *GFPtubGal80<sup>ts</sup>;hhGal4 dronc<sup>i29</sup>/+*, showing activation of JNK (Mmp1, red) in the  
49 posterior compartment (green) 2 h after a pulse of 16h at 29°C. All scale bars are 100  
50  $\mu$ m.  
51

52 **Supplementary Fig. 2**

53

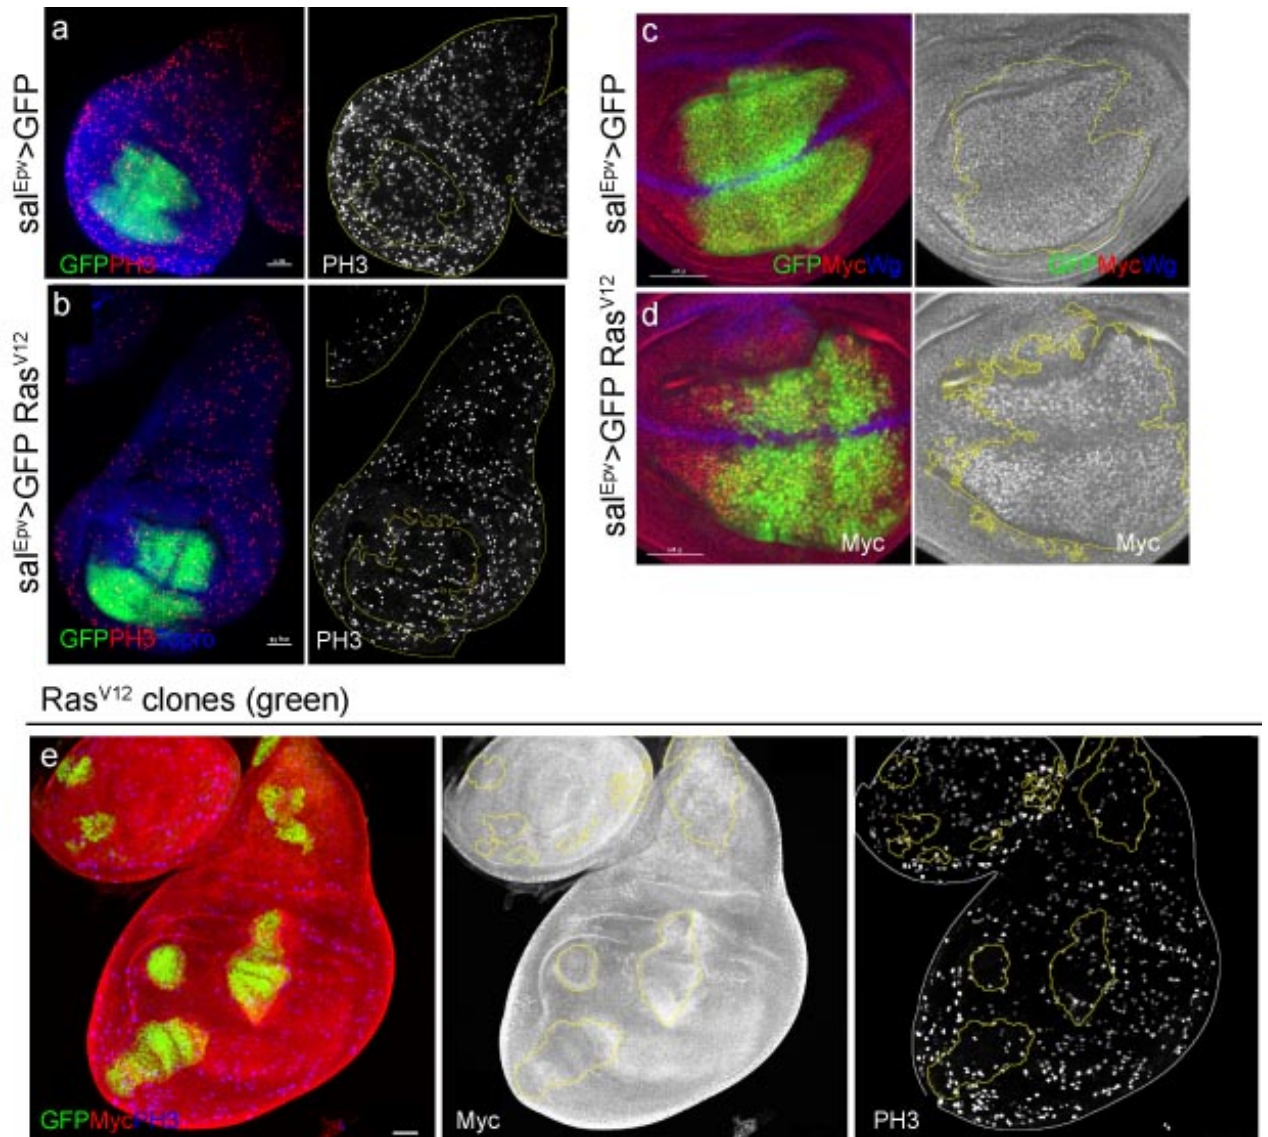

54

55

56 Growth of *Ras<sup>V12</sup>* tissue. **a-d** Images of non-irradiated discs of control genotype *sal-*  
 57 *Gal4UAS-GFP* (**a**, **c**) and experimental genotype *sal<sup>EPW</sup>-Gal4 UAS-GFP/UAS-Ras<sup>V12</sup>* (**b**,  
 58 **d**). Note in **a** (n=8) and **b** (n=23) that the size of the Sal domain (green) is not

59 significantly affected by the over-expression of Ras. Also, PH3 (red) staining indicates  
 60 a similar proliferation rate. **c** (n=13) and **d** (n=9) panels show that Myc (red) levels are

61 higher in *Ras<sup>V12</sup>* than in normal cells, even though the Sal domain is not increased in  
 62 size. **e** Clones of *Ras<sup>V12</sup>* expressing cells induced in discs (n=12) of genotype *hsflptub-*  
 63 *Gal4 UAS-GFP;FRT40A tub-Gal80/FRT40A;UAS-Ras<sup>V12</sup>/+*. The *Ras<sup>V12</sup>* clones (green)

64 show high levels of Myc (red) in some cells but, as indicated by the PH3 staining (blue),  
 65 they grow at the same rate as the surrounding tissue. All scale bars are 57  $\mu$ m.

66

67 **Supplementary Fig. 3**

68

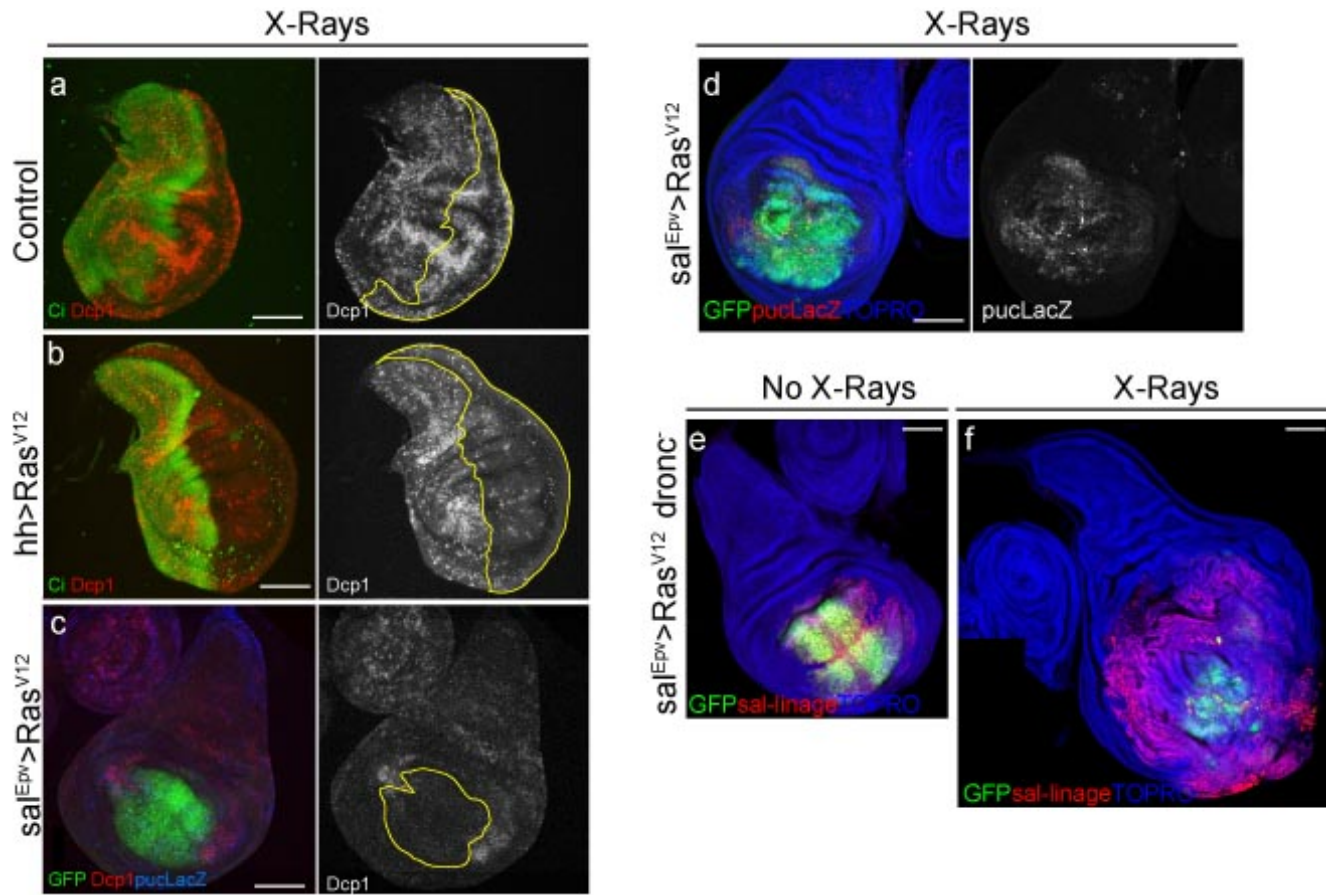

69

70

71 Response of *Ras*<sup>V12</sup> tissue to irradiation **a-c** Images of wing discs of genotypes: **a** *tub-*  
72 *Gal80<sup>ts</sup>/+;hh-Gal4/+* (n=10), **b** *tub-Gal80<sup>ts</sup>/UAS-Ras<sup>V12</sup>;hh-Gal4/+* (n=10) and **c** *sal<sup>EPV</sup>-*  
73 *Gal4UAS-GFP/UAS-Ras<sup>V12</sup>;puclacZ/+* (n=11) 24 h after irradiation. In **a** and **b**, the  
74 posterior compartment is marked by the lack of Ci expression (green), whereas in **c** the  
75 *Ras*<sup>V12</sup> tissue is labelled green with GFP. Note that in **b** and **c** the *Ras*<sup>V12</sup> tissue shows a  
76 strong reduction in the apoptosis response to X-rays, as monitored by staining with the  
77 Dcp1 caspase (red). **d** Image of a wing disc of the genotype: *sal<sup>EPV</sup>-Gal4UAS-*  
78 *GFP/UAS-Ras<sup>V12</sup>;puclacZ/+* that shows persistent JNK activity (red) in the Sal domain  
79 (green) 72 h after irradiation. In non-*Ras*<sup>V12</sup> cells JNK activity is depleted shortly after  
80 irradiation (see figure 1). **e, f**. Wing discs of the genotype *sal-Gal4UAS-*  
81 *GFP/act<stop>lacZUAS-Flp;dronc<sup>i29</sup>UAS-Ras<sup>V12</sup>/dronc<sup>i24</sup>* non-irradiated **e** (n=6) and  
82 96 h after irradiation **f** (n=9). In this experiment we have used the *act>stop>lacZ*  
83 cassette to trace the lineage (red) of the cells in the Sal domain. The only difference  
84 between the two discs is that the one in F has been irradiated. Yet, there is a large  
85 difference in size, especially in the wing pouch, illustrated by the *lacZ*-expressing cells  
86 in red. Note that the notum area, in the top left part of the images is similar in both  
87 discs. All scale bars are 100 μm.

88
